# Supplementary material for: MicroRNA pharmacogenomics based integrated model of miR-17-92 cluster in sorafenib resistant HCC cells reveals a strategy to forestall drug resistance
Source: PubMed Central journal article supplement (PMC5597599; doi:10.1038/s41598-017-11943-1), 2017-09-13
Supplement: 41598_2017_11943_MOESM1_ESM.pdf [file 41598_2017_11943_MOESM1_ESM.pdf]

# Supplementary Information

## Title

MicroRNA pharmacogenomics based integrated model of miR-17-92 cluster in sorafenib resistant HCC cells reveals a strategy to forestall drug resistance

## Authors

Faryal Mehwish Awan<sup>1</sup>, Anam Naz<sup>1</sup>, Ayesha Obaid<sup>1</sup>, Aqsa Ikram<sup>1</sup>, Amjad Ali<sup>1</sup>, Jamil Ahmad<sup>2</sup>, Abdul Khaliq Naveed<sup>3</sup>, Hussnain Ahmed Janjua\*<sup>1</sup>

## Affiliations

<sup>1</sup>Atta-ur-Rahman School of Applied Biosciences (ASAB), National University of Sciences and Technology (NUST), H-12 Islamabad, Pakistan.

<sup>2</sup>Research Center for Modeling and Simulation (RCMS), National University of Sciences and Technology (NUST), H-12 Islamabad, Pakistan.

<sup>3</sup>Islamic International Medical College (IIMC), Riphah International University, Rawalpindi, Pakistan

## \*Corresponding author

Hussnain Ahmed Janjua

E-mail: [janjua.hussnain@gmail.com](mailto:janjua.hussnain@gmail.com) ; [hussnain.janjua@asab.nust.edu.pk](mailto:hussnain.janjua@asab.nust.edu.pk)

Telephone number: +92 323 5680231

## Author's contact information

Faryal Mehwish Awan [faryal\\_mehwish@yahoo.com](mailto:faryal_mehwish@yahoo.com)

Anam Naz [anam.naz88@live.com](mailto:anam.naz88@live.com)

Ayesha Obaid [aysha\\_obaid\\_nust@live.com](mailto:aysha_obaid_nust@live.com)

Aqsa Ikram [aqsa\\_ikram@yahoo.com](mailto:aqsa_ikram@yahoo.com)

Anjad Ali [amjaduni@gmail.com](mailto:amjaduni@gmail.com)

Jamil Ahmad [dr.ahmad.jamil@gmail.com](mailto:dr.ahmad.jamil@gmail.com)

Abdul Khaliq Naveed [khaliqnaveed2001@yahoo.com](mailto:khaliqnaveed2001@yahoo.com)

Hussnain Ahmed Janjua\* [janjua.hussnain@gmail.com](mailto:janjua.hussnain@gmail.com) ; [hussnain.janjua@asab.nust.edu.pk](mailto:hussnain.janjua@asab.nust.edu.pk)

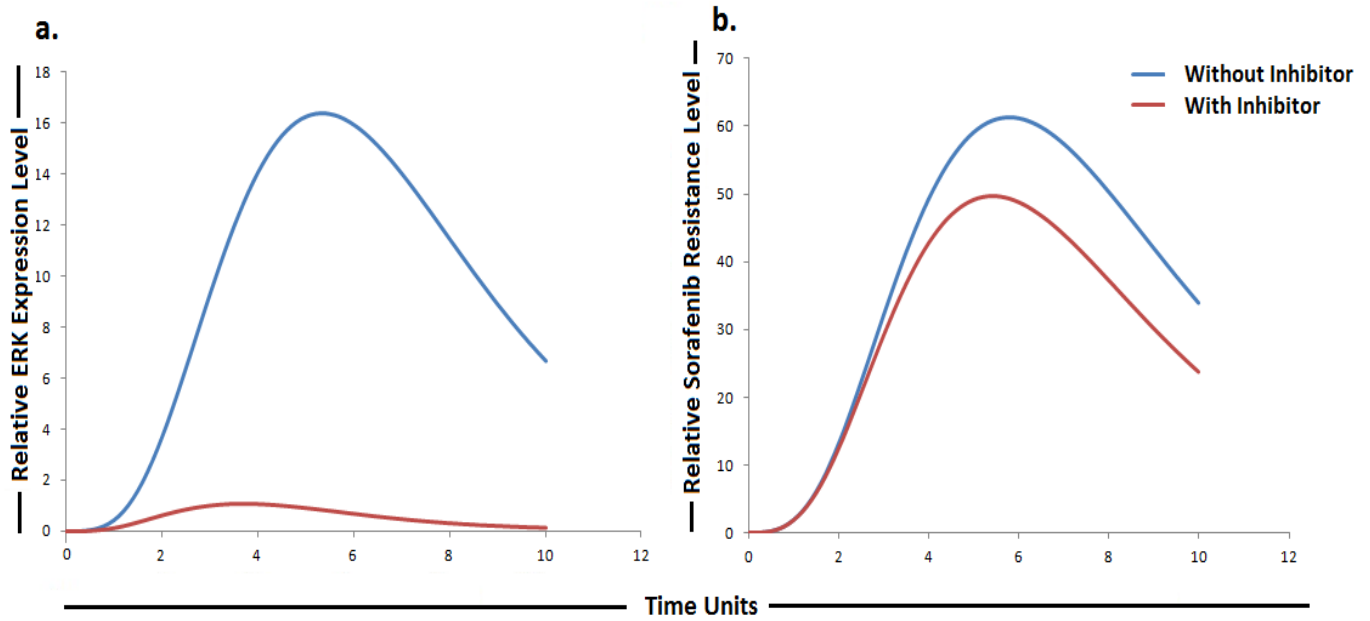

**Figure S1.** Simulation of relative ERK expression level (a) and relative sorafenib resistance levels (b) with and without ERK inhibitor. Time units are represented on x-axis with relative levels on y-axis

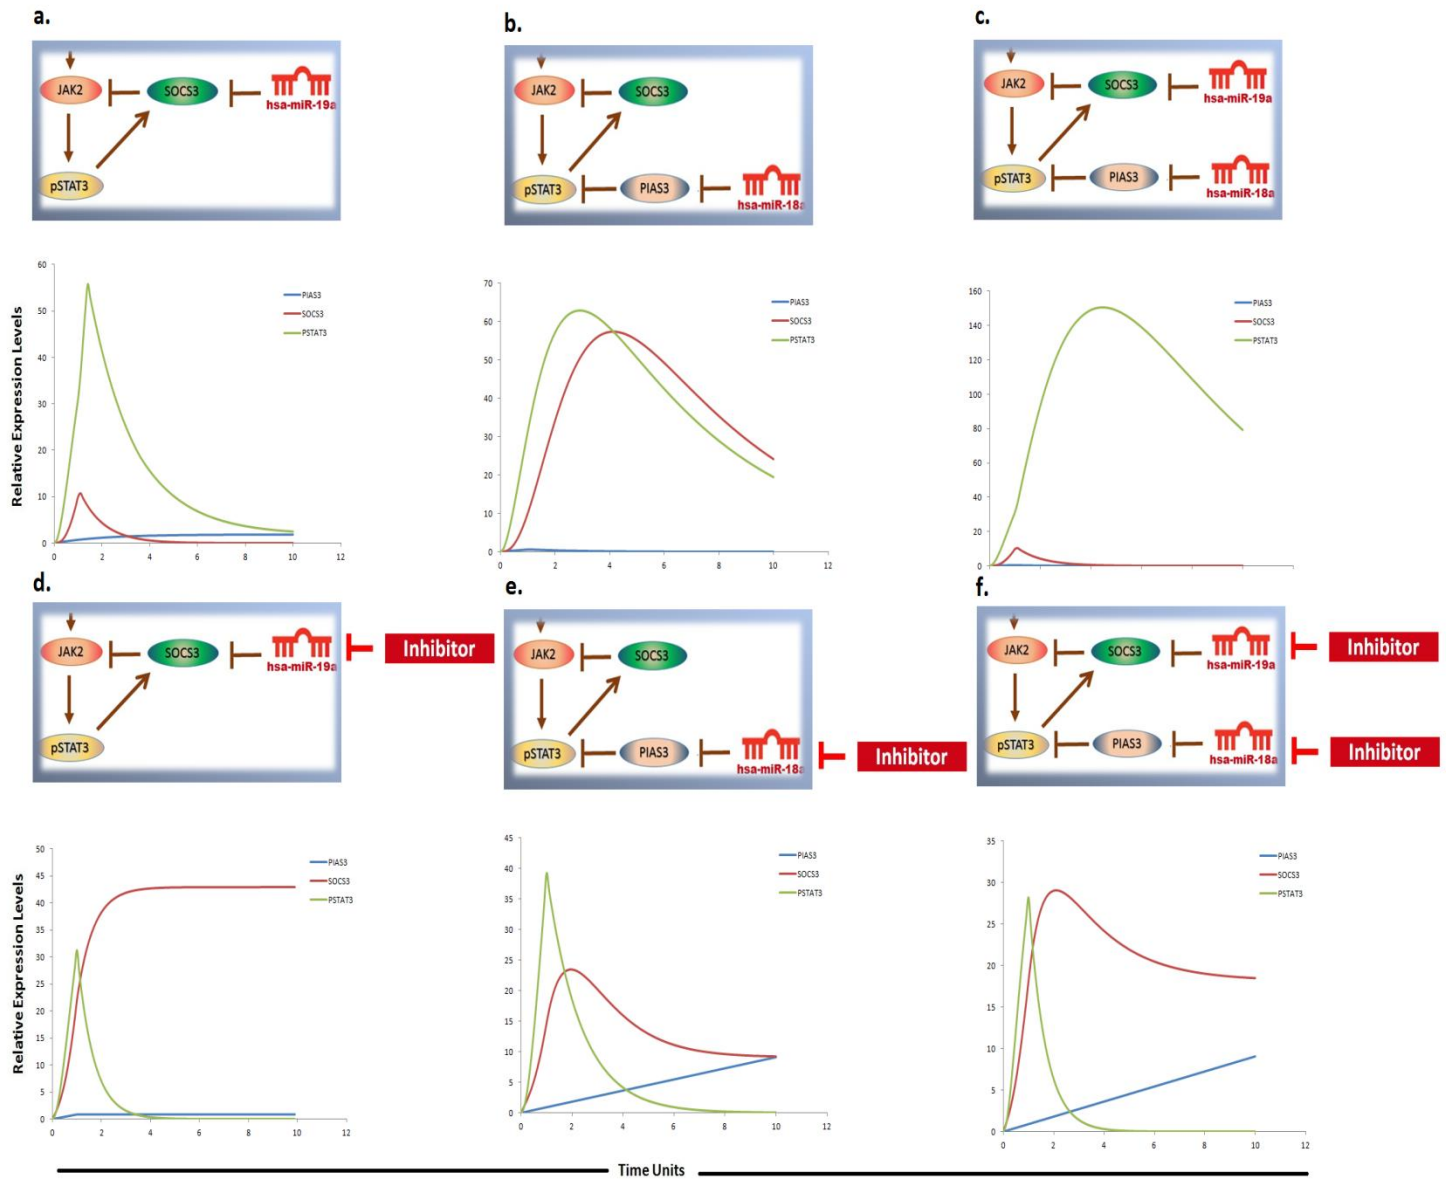

**Figure S2.** Simulation of SOCS3, PIAS3 and STAT3 in the presence of miR-19a only (a), in the presence of miR-18a only (b), in the presence of both miR-19a and miR18a (c), in the presence of miR-19a inhibitor only (d), in the presence of miR-18a inhibitor only (e), and in the presence of both miR-19a inhibitor and miR-18a inhibitor (f). Time units are represented on x-axis with relative expression levels of SOCS3, PIAS3 and STAT3 on y-axis. Relative levels of SOCS3, PIAS3 and STAT3 are shown in red, blue and green lines respectively.
